# Supplementary material
Source: publisher site journal article supplement (https://www.spandidos-publications.com/4694/downloadSupplementary)

Figure S1. Changes of gene expressions in NASH livers using microarray analysis. Gene expression was changed in the NASH group at 1, 2 and 6 weeks with >1.5-fold difference compared with the control group. White bar indicates increased gene expression, and black bar indicates decreased gene expression. NASH, non-alcoholic steatohepatitis.

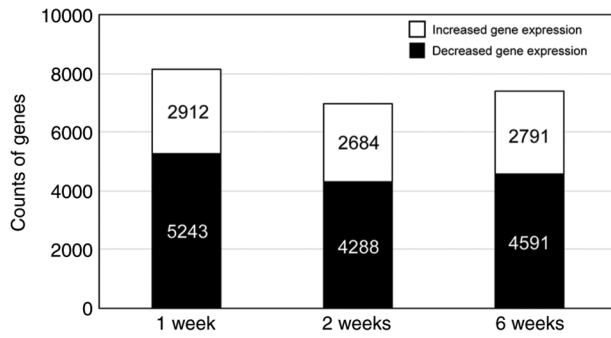

Figure S2. Prediction of upstream regulatory molecules by upstream analysis. The type and number of upstream molecules involved in gene expression changes at 1, 2 and 6 weeks are shown. Blue bars indicate activated gene expression, and orange bars indicate inhibited gene expression.

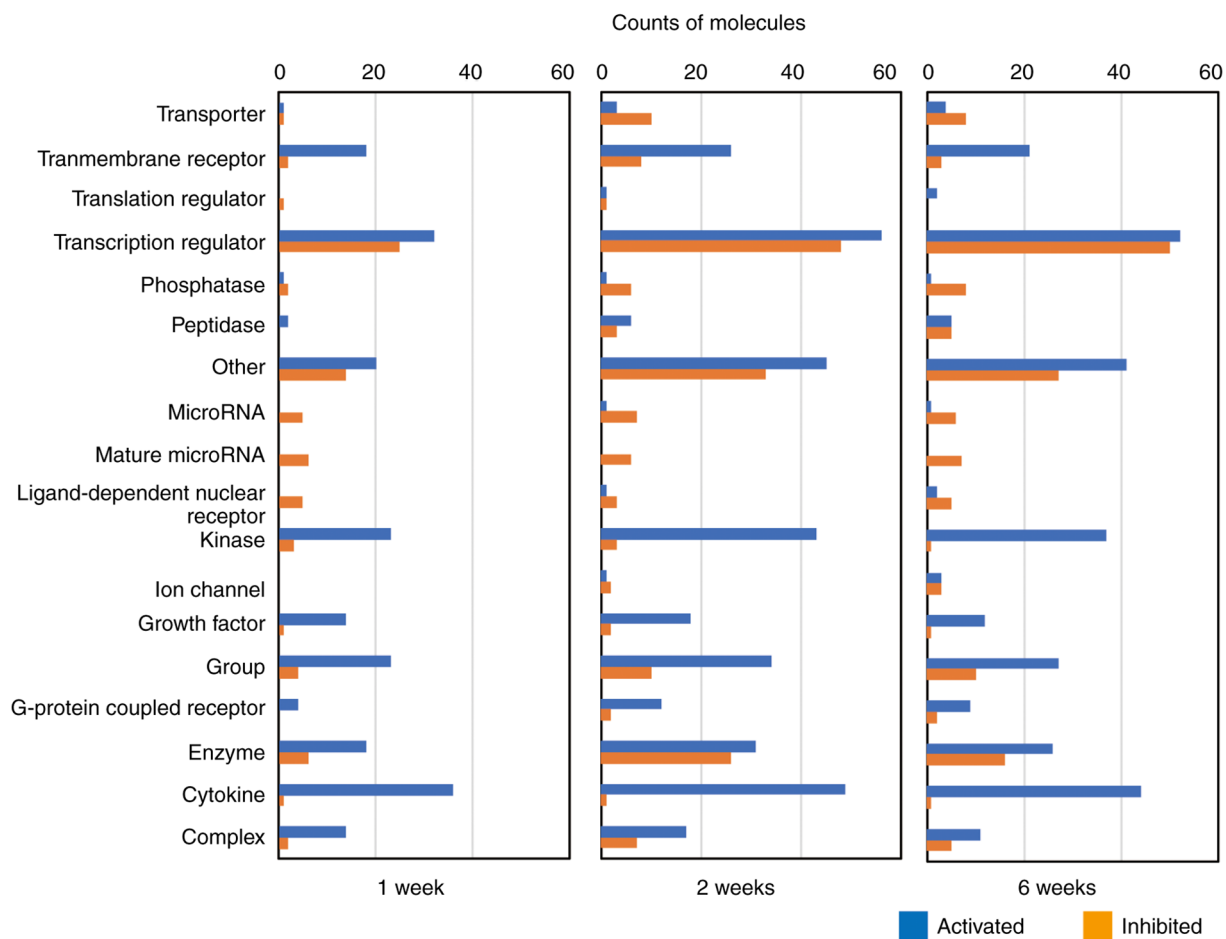

Supplement: Supplementary file 1 [file downloadSupplementary]
